# Supplementary material
Source: Springer Nature journal article supplement (https://www.springermedizin.de/resource/supplementary/12902_2014_276_MOESM1_ESM.pdf/9515932)

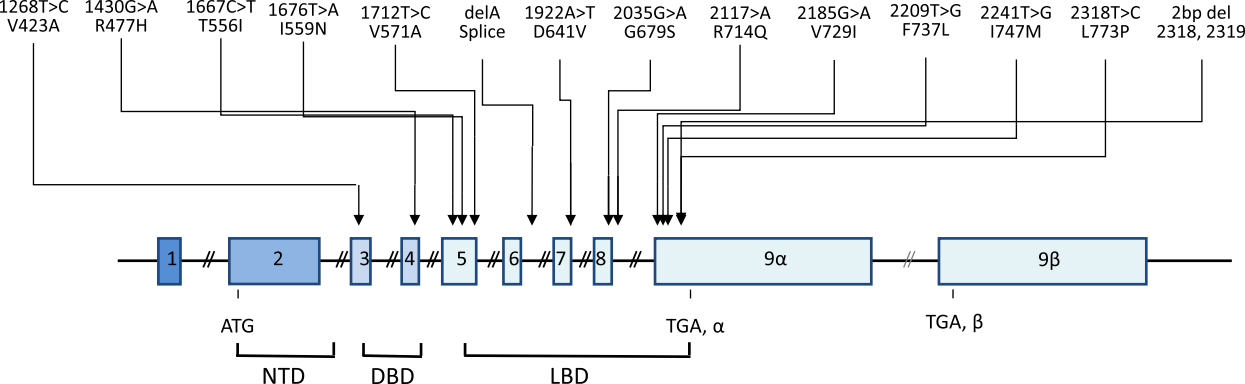

Supplement: MOESM1 [file 9515932]
